# Supplementary material for: Cerium(iv)-containing oxomolybdenum cluster with a unique Ce6Mo9O38 core structure
Source: Royal Society of Chemistry journal article supplement (doi:10.1039/b800176f), 2008-01-01

## **Electronic Supplementary Information**

### **Cerium(IV)-containing oxomolybdenum cluster with a unique**

### **Ce<sub>6</sub>Mo<sub>9</sub>O<sub>38</sub> core structure**

Xiao-Yi Yi, Herman H. Y. Sung, Ian D. Williams and Wa-Hung Leung\*

#### **Contents**

- 1. Complete experimental procedures and characterization data for complexes 1-5.**
- 2. <sup>1</sup>H and <sup>31</sup>P NMR spectra of complex 3 (Figures S1 and S2)**

## 1. Complete experimental procedures and characterization data for complexes 1-5

### General considerations

Unless otherwise stated, all manipulations were carried out in air. NMR spectra were recorded on a Varian Mercury 300 spectrometer operating at 300 and 121.5 MHz for  $^1\text{H}$  and  $^{31}\text{P}$ , respectively. Chemical shifts ( $\delta$ , ppm) were reported with reference to  $\text{SiMe}_4$  ( $^1\text{H}$ ) and  $\text{H}_3\text{PO}_4$  ( $^{31}\text{P}$ ), respectively. Infrared spectra were recorded on a Perkin-Elmer 16 PC FT-IR spectrophotometer and mass spectra on a Finnigan TSQ 7000 spectrometer. Elemental analyses were performed by Medac Ltd., Surrey, U. K. The ligand  $\text{NaL}_{\text{OEt}}^1$  was prepared according to a literature method.

### Preparation of $[\text{Ce}(\text{L}_{\text{OEt}})_2(\text{NO}_3)_2]$ **1**

To a solution (10 mL) of  $\text{NaL}_{\text{OEt}}$  (198 mg, 0.35 mmol) in water (10 mL) was added  $[\text{NH}_3]_2[\text{Ce}(\text{NO}_3)_6]$  (97.2 mg, 0.18 mmol) in water (5 mL) dropwise over 5 min. The orange precipitate was collected, washed with water, and dried *in vacuo*. X-ray quality crystals were obtained by slow evaporation of a saturated  $\text{CH}_2\text{Cl}_2$ -hexane solution. Yield: 220 mg (93%).  $^1\text{H}$  NMR ( $\text{CDCl}_3$ ):  $\delta$  1.30 (t, 36H,  $\text{CH}_3$ ), 4.08-4.12 (m, 24H,  $\text{OCH}_2$ ), 5.12 (s, 10H,  $\text{C}_5\text{H}_5$ ).  $^{31}\text{P}$   $\{^1\text{H}\}$  NMR ( $\text{CDCl}_3$ ):  $\delta$  121.1 (s). Anal. Calc. for  $\text{C}_{34}\text{H}_{70}\text{CeCo}_2\text{N}_2\text{O}_{24}\text{P}_6$ : C, 30.60; H, 5.29; N, 2.10. Found: C, 30.21; H, 5.42; N, 2.18. MS (FAB):  $m/z$  1272 ( $\text{M}^+ - \text{NO}_3$ ), 1210 ( $\text{M}^+ - 2\text{NO}_3$ ). IR (KBr,  $\text{cm}^{-1}$ ): 1292 [ $\nu(\text{NO}_3)$ ].

### Preparation of $[\text{Ce}(\text{L}_{\text{OEt}})_2(\text{Cr}_2\text{O}_7)]$ **2**

To a solution of **1** (75 mg, 0.056 mmol) in water (18 mL) was added  $\text{Na}_2\text{Cr}_2\text{O}_7 \cdot 2\text{H}_2\text{O}$  (18 mg, 0.060 mmol) in water (2 mL), and the mixture was stirred for 10 min. The orange solid was collected and recrystallized from  $\text{CH}_2\text{Cl}_2$ -hexane to give orange crystals which were suitable for X-ray diffraction. Yield: 72 mg (90%).  $^1\text{H}$  NMR ( $\text{CDCl}_3$ ):  $\delta$  1.26 (t, 36H,  $\text{CH}_3$ ), 4.24-4.28 (m, 24H,  $\text{OCH}_2$ ), 5.08 (s, 10H,  $\text{C}_5\text{H}_5$ ).  $^{31}\text{P}$   $\{^1\text{H}\}$  NMR ( $\text{CDCl}_3$ ):  $\delta$  118.9 (s). IR (KBr,  $\text{cm}^{-1}$ ): 861 sh, 964 sh [ $\nu(\text{Cr}=\text{O})$ ]. Anal. Calc. for  $\text{C}_{34}\text{H}_{70}\text{CeCo}_2\text{Cr}_2\text{O}_{25}\text{P}_6$ : C, 28.62; H, 4.95. Found: C, 28.58; H, 4.89.

**Preparation of [H<sub>4</sub>(L<sub>OEt</sub>Ce)<sub>6</sub>Mo<sub>9</sub>O<sub>38</sub>] 3**

To a solution of **1** (120 mg, 0.090 mmol) in water (30 mL) was added (NH<sub>4</sub>)<sub>6</sub>Mo<sub>7</sub>O<sub>24</sub>·4H<sub>2</sub>O (37 mg, 0.30 mmol) in water (3 mL), and the mixture was stirred for 10 min. The yellow precipitate was collected, and re-dissolved in CH<sub>2</sub>Cl<sub>2</sub>-thf-hexane (v:v:v = 10:2:2), dried over with anhydrous Na<sub>2</sub>SO<sub>4</sub>. Slow evaporation of the filtrate gave orange crystals of **3** (yield: 45 mg, 57 %). The mother liquor was left to stand in air overnight to give yellow crystals identified as [MoL<sub>OEt</sub>(O)<sub>2</sub>]<sub>2</sub>(μ-O) **4** (yield: 28 mg, 46 %), which could be synthesised directly from (NH<sub>4</sub>)<sub>6</sub>Mo<sub>7</sub>O<sub>24</sub>·4H<sub>2</sub>O and NaL<sub>OEt</sub> (see below). <sup>1</sup>H NMR (CDCl<sub>3</sub>): δ 1.26 (t, 108H, CH<sub>3</sub>), 4.20 (m, 72H, OCH<sub>2</sub>), 5.03 (s, 30H, C<sub>5</sub>H<sub>5</sub>). <sup>31</sup>P {<sup>1</sup>H} NMR (CDCl<sub>3</sub>): δ 117.8 (s). IR (KBr, cm<sup>-1</sup>): 845 [ν(Mo=O)]. MS (ESI): *m/z* 5510.1219 [M<sup>+</sup> - OH]. Anal. Calc. for C<sub>102</sub>H<sub>214</sub>Co<sub>6</sub>Ce<sub>6</sub>Mo<sub>9</sub>O<sub>92</sub>P<sub>18</sub>: C, 22.16; H, 3.90; P, 10.54. Found: C, 22.78; H, 3.86; P, 10.54.

**Preparation of [MoL<sub>OEt</sub>(O)<sub>2</sub>]<sub>2</sub>(μ-O) 4**

To a solution of (NH<sub>4</sub>)<sub>6</sub>Mo<sub>7</sub>O<sub>24</sub> (150 mg, 0.12 mmol) in 1.8 M H<sub>2</sub>SO<sub>4</sub> (30 mL) was added the solution of NaL<sub>OEt</sub> (250 mg, 0.25 mmol) in water (30 mL) dropwise, and the yellow solution was stirred at room temperature for 20 min. The precipitate was collected, re-dissolved in CH<sub>2</sub>Cl<sub>2</sub> and dried over anhydrous Na<sub>2</sub>SO<sub>4</sub>. Slow evaporation of the solvent afforded yellow crystals that were characterized as [MoL<sub>OEt</sub>(O)<sub>2</sub>]<sub>2</sub>(μ-O)<sub>2</sub> **4** by an X-ray diffraction study.<sup>2</sup> Yield: 80 mg (56 %). <sup>1</sup>H NMR (CDCl<sub>3</sub>): δ 1.27 (m, 36H, CH<sub>3</sub>), 4.17 (m, 24H, OCH<sub>2</sub>), 5.03 (s, 10H, C<sub>5</sub>H<sub>5</sub>). <sup>31</sup>P {<sup>1</sup>H} NMR (CDCl<sub>3</sub>): δ 113.9 (*pseudo* d), 123.8 (*pseudo* t). IR (KBr, cm<sup>-1</sup>): 902 [ν(Mo=O)], 772, 631 [ν(Mo-O<sub>b</sub>)]. MS (FAB): 1342 (M<sup>+</sup> + 1).

**Preparation of [H<sub>4</sub>(L<sub>OEt</sub>Zr)<sub>6</sub>Mo<sub>9</sub>O<sub>38</sub>] 5**

[Zr(L<sub>OEt</sub>)(CH<sub>3</sub>CO<sub>2</sub>)<sub>3</sub>] was prepared by refluxing [L<sub>OEt</sub>ZrF<sub>3</sub>]<sup>3</sup> with trimethylsilyl acetate in CH<sub>2</sub>Cl<sub>2</sub> under nitrogen and recrystallized from hexane. To a solution of [Zr(L<sub>OEt</sub>)(CH<sub>3</sub>CO<sub>2</sub>)<sub>3</sub>] (100 mg) in water (30 mL) was added (NH<sub>4</sub>)<sub>6</sub>Mo<sub>7</sub>O<sub>24</sub>·4H<sub>2</sub>O (18 mg) in water (3 mL), and the milky suspension was stirred overnight. The yellow precipitate was collected, re-dissolved in

CH<sub>2</sub>Cl<sub>2</sub>, and dried over anhydrous Na<sub>2</sub>SO<sub>4</sub>, and the solvent was evaporated to dryness. Recrystallization from CHCl<sub>3</sub>-hexane afforded yellow crystals which were identified as [H<sub>4</sub>(L<sub>OEt</sub>Zr)<sub>6</sub>Mo<sub>9</sub>O<sub>38</sub>] **5** by an X-ray diffraction study. Yield: 10 mg (7 %). <sup>1</sup>H NMR (CDCl<sub>3</sub>): δ 1.31 (t, 108H, CH<sub>3</sub>), 4.14 (m, 72H, OCH<sub>2</sub>), 5.12 (s, 30H, C<sub>5</sub>H<sub>5</sub>). <sup>31</sup>P {<sup>1</sup>H} NMR (CDCl<sub>3</sub>): δ 121.4 (s). IR (KBr, cm<sup>-1</sup>): 860 [ν(Mo=O)].

## References

- 1 W. Kläui, *Z. Naturforsch.* 1979, **34 B**, 1403.
- 2 X.-Y. Yi, I. D. Williams and W.-H. Leung, unpublished results.
- 3 (a) T. C. H. Lam, E. Y. Y. Chan, W.-L. Mak, S. M. F. Lo, I. D. Williams, W.-T. Wong and W.-H. Leung, *Inorg. Chem.*, 2003, **42**, 1842. (b) Q.-F. Zhang, T. C. H. Lam, X.-Y. Yi, E. Y. Y. Chan, W.-Y. Wong, H. H. Y. Sung, I. D. Williams and W.-H. Leung, *Chem.-Eur. J.*, 2005, **11**, 101.

Figure S1  $^1\text{H}$  NMR ( $\text{CDCl}_3$ , 300 MHz, 298 K) spectrum of compound **3**. Resonances at ca.  $\delta$  7.26 and 1.6 ppm are due to  $\text{CHCl}_3$  and water, respectively.

Fig S1

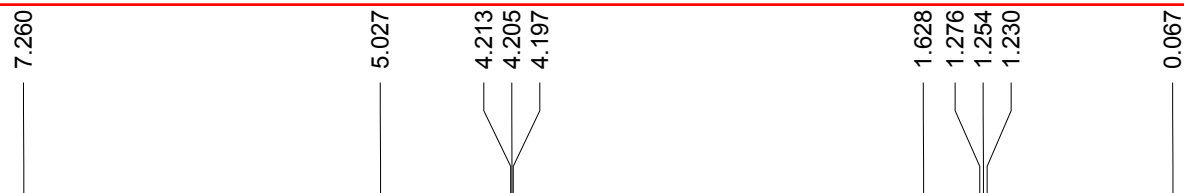

Sample: H4[(LoetCe)6(MoO4)8(MoO6)]

Oct 16 00:51:41 2007  
SOLVENT:  $\text{CDCl}_3$   
Experiment = zg30  
Pulse length = 10.000 usec  
Recycle delay = 3.000 sec  
NA = 16  
PTS1d = 16384  
F1 = 300.130005 MHz  
F2 = 1.000000 MHz  
SW1 = 6250.00 Hz  
AT1 = 2.62 sec  
Hz per Pt 1stD = 0.38 Hz  
SW2 = 1.00 Hz  
Hz per Pt 2ndD = 1.00 Hz  
O1 = 1841.4885 Hz  
O2 = -1.0000 Hz  
LB1 = 0.30 Hz  
TP A = 0.00  
B = 0.00  
C = 0.00

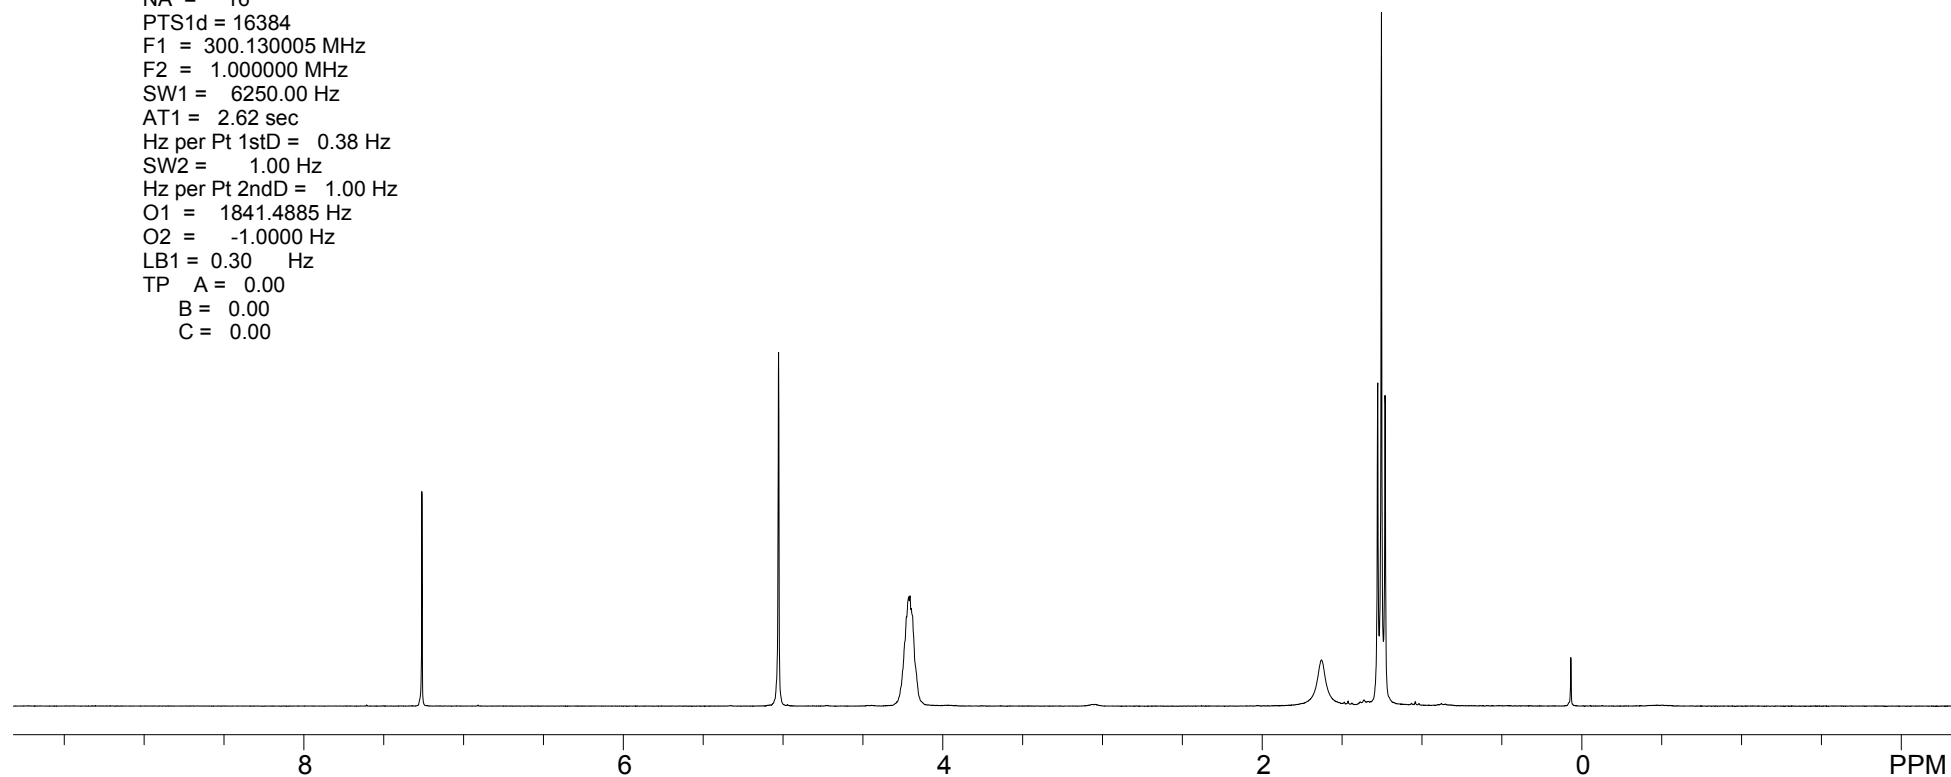

Figure S2  $^{31}\text{P}$   $\{^1\text{H}\}$  NMR ( $\text{CDCl}_3$ , 121.5 MHz, 298 K) spectrum of complex **3**.

Fig. S2

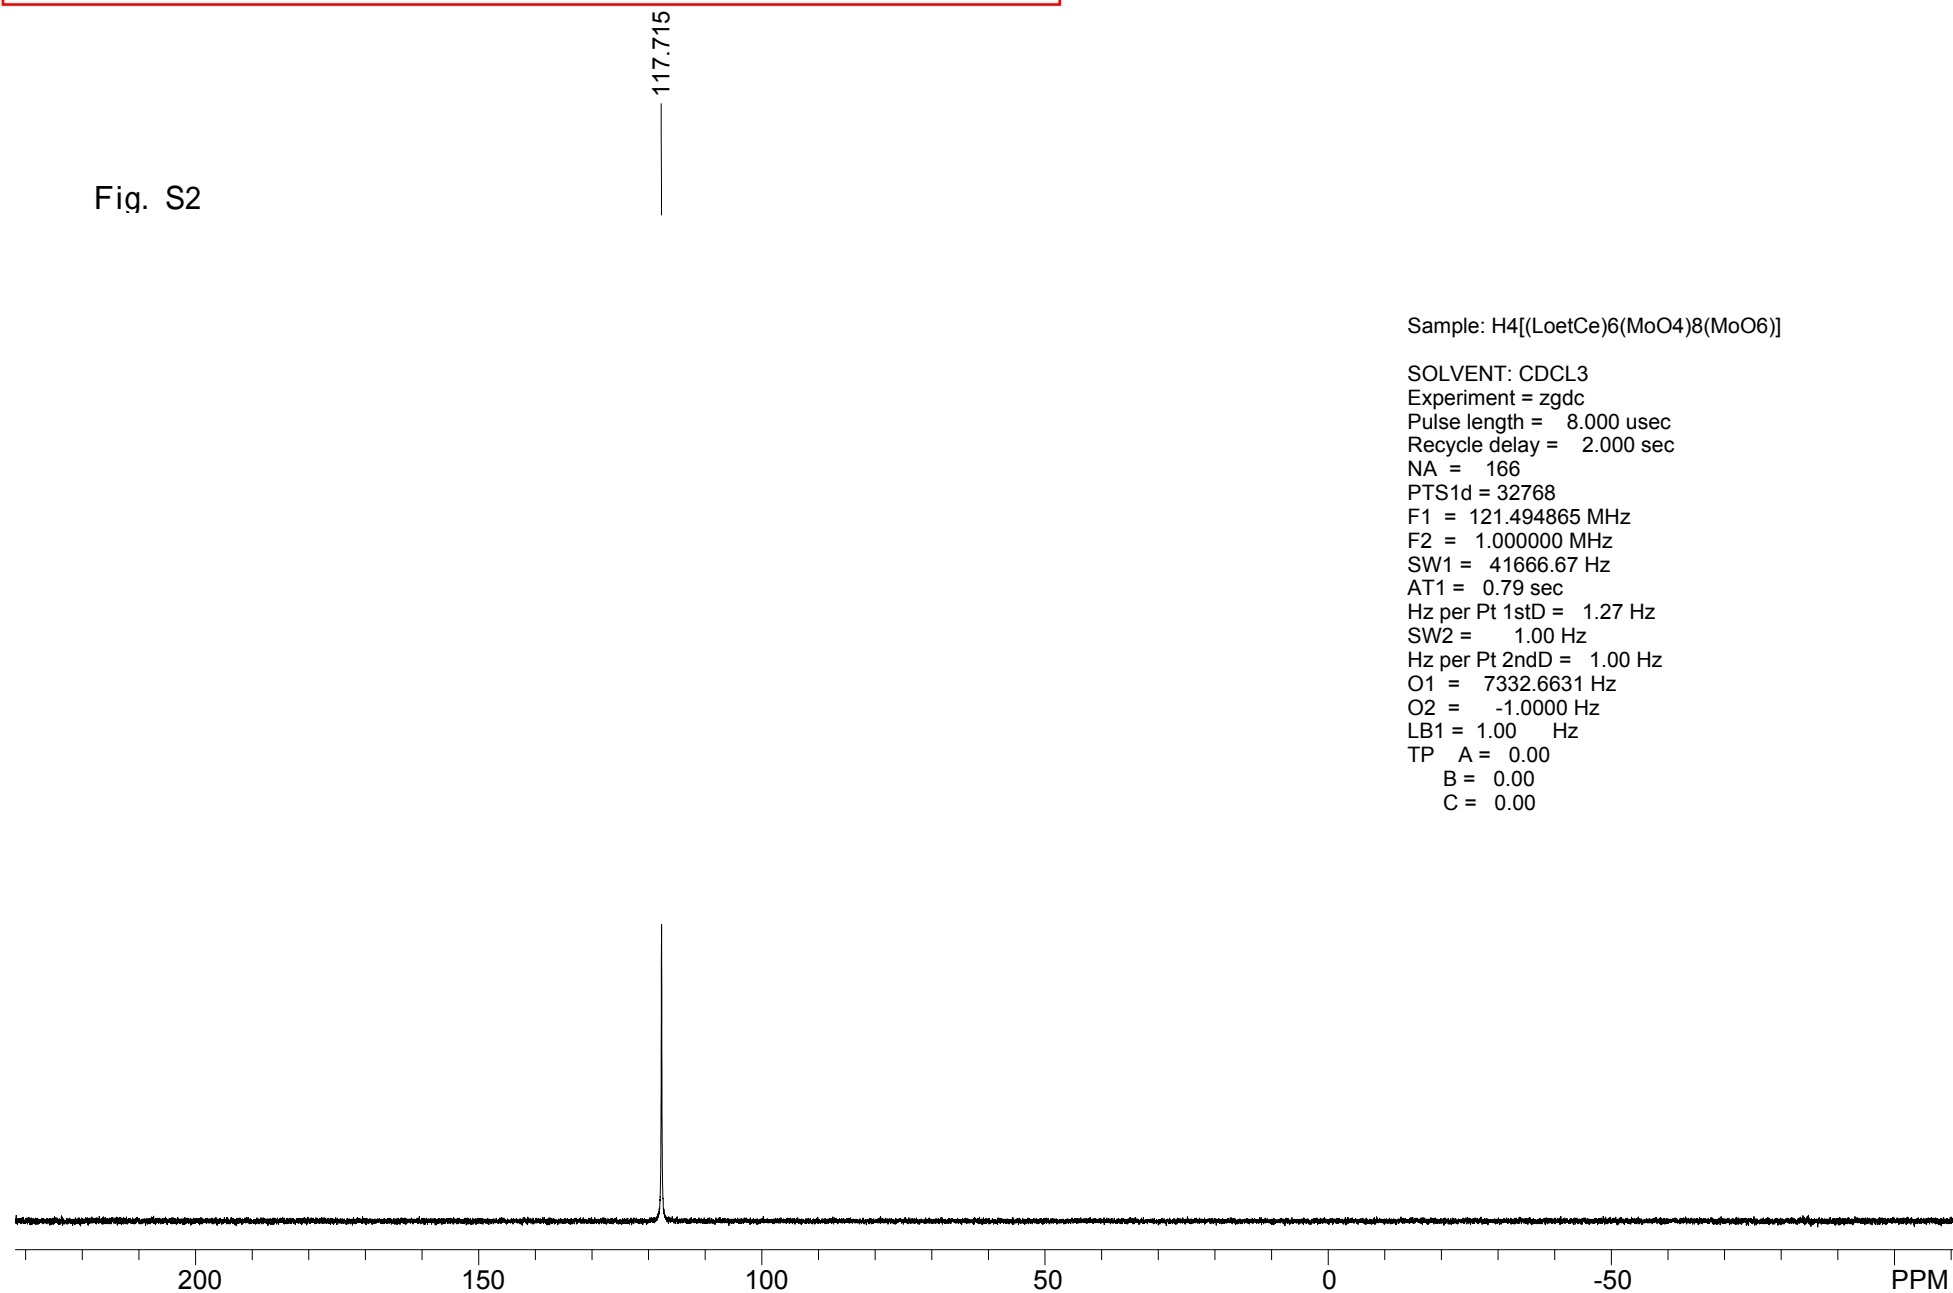

Supplement: b800176f.pdf [file b800176f.pdf]
